# Supplementary material
Source: publisher figshare collection journal article supplement (https://acs.figshare.com/ndownloader/files/24558316)
Supplement: Supplementary file 1 [file 24558316]

## **Rational Design of Suprastat, a Novel Selective Histone Deacetylase 6 Inhibitor with the Ability to Potentiate Immunotherapy in Melanoma Models**

Satish Noonepalle<sup>a,†</sup>, Sida Shen<sup>b,†,‡</sup>, Jakub Ptáček<sup>d</sup>, Maurício T. Tavares<sup>b,¶</sup>, Guiping Zhang<sup>b</sup>, Jan Stránský<sup>e</sup>, Jiří Pavlíček<sup>e</sup>, Glaucio M. Ferreira<sup>f</sup>, Melissa Hadley<sup>a</sup>, Guido Pelaez<sup>a</sup>, Cyril Bařinka<sup>\*,d</sup>, Alan P. Kozikowski<sup>\*,c</sup>, Alejandro Villagra<sup>\*,a</sup>

<sup>a</sup> Department of Biochemistry and Molecular Medicine, The George Washington University, Washington, District of Columbia 20052, United States

<sup>b</sup> Department of Medicinal Chemistry and Pharmacognosy, College of Pharmacy, University of Illinois at Chicago, Chicago, Illinois 60612, United States

<sup>c</sup> Bright Minds Biosciences, Toronto, ON M5H 3V9, Canada

<sup>d</sup> Laboratory of Structural Biology, Institute of Biotechnology of the Czech Academy of Sciences, BIOCEV, Prumyslova 595, 252 50 Vestec, Czech Republic

<sup>e</sup> Centre of Molecular Structure, Institute of Biotechnology of the Czech Academy of Sciences, BIOCEV, Prumyslova 595, 252 50 Vestec, Czech Republic

<sup>f</sup> Department of Pharmacy, School of Pharmaceutical Sciences, University of São Paulo, São Paulo, SP, 05508-000, Brazil

<sup>†</sup>S.N. and S.S contributed equally to this work.

### **Corresponding Author**

\*C.B.: Tel: +420-325-873-777; E-mail: [Cyril.Barinka@ibt.cas.cz](mailto:Cyril.Barinka@ibt.cas.cz).

\*A.P.K.: Tel: +1-773-793-5866; E-mail: [alan@brightmindsbio.com](mailto:alan@brightmindsbio.com).

\*A.V.: Tel: +1-202-994-9547; E-mail: [avillagra@gwu.edu](mailto:avillagra@gwu.edu).

## Table of Contents

|                                                                              |     |
|------------------------------------------------------------------------------|-----|
| 1. Supplementary Figures .....                                               | S3  |
| 2. Supplementary Tables .....                                                | S5  |
| 3. $^1\text{H}$ NMR and $^{13}\text{C}$ NMR spectra for compounds 6a-c ..... | S8  |
| 4. HPLC purity reports for compounds 6a-c.....                               | S11 |

## 1. Supplementary Figures

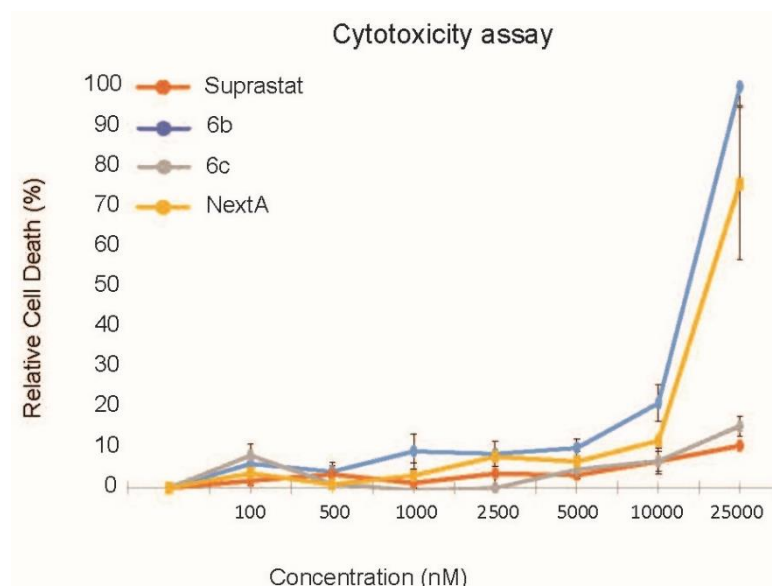

**Figure S1.** Suprastat induces low cytotoxicity compared to other HDAC6 inhibitors.

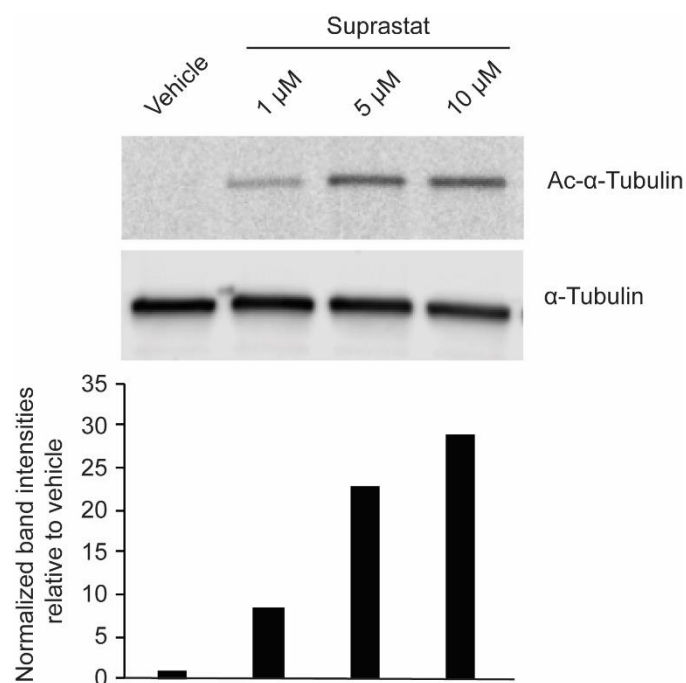

**Figure S2.** RAW 264.7 macrophages treated with increasing concentration of Suprastat. Band intensities quantified and represented as fold change relative to vehicle indicates a dose-dependent effect of Suprastat on  $\alpha$ -tubulin acetylation.

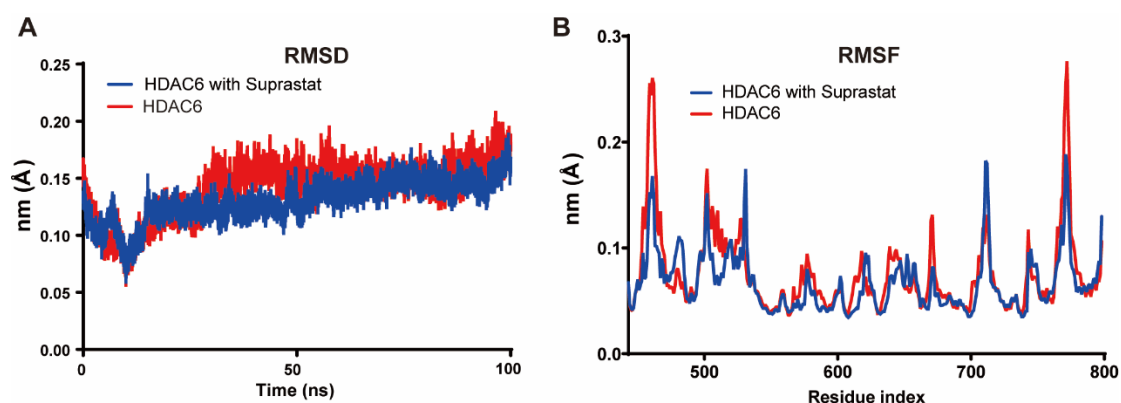

**Figure S3.** Variation of RMSD (A) and RMSF (B) values for HDAC6 and the HDAC6-Suprastat complex along the MD simulations. Values were calculated for the protein backbone.

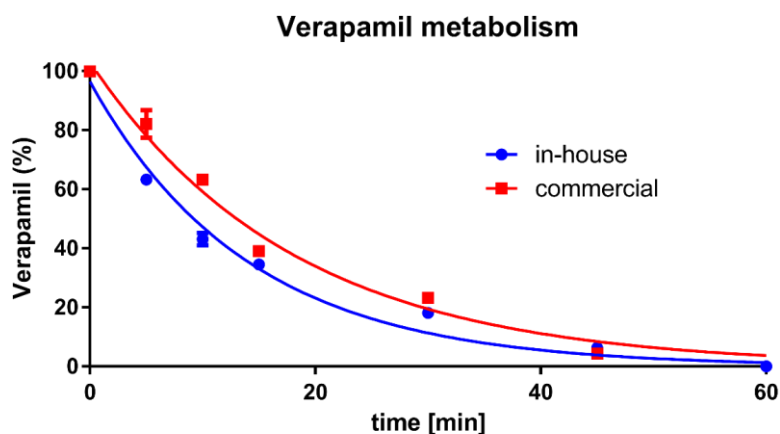

**Figure S4.** Comparison of commercial and in-house microsomal preparations. Both microsomal preparations were diluted to the final concentration of 0.5 mg/mL (total protein), Verapamil was added to the final concentration of 10  $\mu$ M and the reaction started by the addition of NADPH solution. Aliquots were collected at defined time points and samples processed and analyzed by LC-MS. The metabolic activity of our in-house rat liver microsomes (blue) is virtually identical to commercially available preparations (red; rat liver microsomes, RTCPL, Life Technologies, CA, USA).

## 2. Supplementary Tables

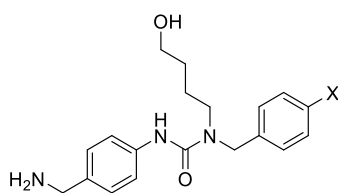

**Table S1.** Inhibitory potency of NextA and its analogues **6d-f** against HDAC 1 and HDAC6

| Compound                | X | HDAC6 (IC <sub>50</sub> , nM) | HDAC1 (IC <sub>50</sub> , nM) | HDAC1/6 |
|-------------------------|---|-------------------------------|-------------------------------|---------|
| Suprastat ( <b>6a</b> ) |   | 0.4 ± 0.0                     | 117 ± 10                      | 293     |
| <b>6d</b>               |   | 16,755                        | N.D. <sup>g</sup>             | N.D.    |
| <b>6e</b>               |   | >30,000                       | N.D.                          | N.D.    |
| <b>6f</b>               |   | >30,000                       | N.D.                          | N.D.    |
| Vorinostat              | - | 6.7 ± 1.0                     | 31 ± 12                       | 5       |

**Table S2.** Crystal data collection and refinement statistics

|                                                           |                                                                                                                    |
|-----------------------------------------------------------|--------------------------------------------------------------------------------------------------------------------|
| X-ray source                                              | BL 14.2, Bessy II                                                                                                  |
| Detector                                                  | Pilatus3 2M                                                                                                        |
| Wavelength (Å)                                            | 0.9184                                                                                                             |
| Crystal-to-detector distance (mm)                         | 207.4                                                                                                              |
| No. of frames                                             | 3600                                                                                                               |
| Exposure per degree (s)                                   | 2                                                                                                                  |
| Oscillation angle (°)                                     | 0.1                                                                                                                |
| Space group                                               | P 1 2 <sub>1</sub> 1                                                                                               |
| Unit-cell parameters                                      | A = 54.809 Å, b = 83.811 Å, c = 86.092 Å<br>$\alpha = 90.0^\circ$ , $\beta = 98.0^\circ$ , $\gamma = 90.000^\circ$ |
| Resolution (Å)                                            | 85.3 – 1.6 (1.63 – 1.6)                                                                                            |
| No. of measured reflections                               | 641645 (32445)                                                                                                     |
| No. of unique reflections                                 | 100361 (5038)                                                                                                      |
| Average multiplicity                                      | 6.7 (6.4)                                                                                                          |
| Completeness (%)                                          | 98.8 (99.6)                                                                                                        |
| Average $I/\sigma(I)$                                     | 6.5 (1.3)                                                                                                          |
| $CC_{1/2}$                                                | 0.994 (0.612)                                                                                                      |
| $R_{merge}$                                               | 0.16 (1.164)                                                                                                       |
| $R_{pim}$                                                 | 0.07 (0.494)                                                                                                       |
| $R_{work}$                                                | 0.191                                                                                                              |
| $R_{free}$                                                | 0.230                                                                                                              |
| $R_{all}$                                                 | 0.192                                                                                                              |
| Average ADP (Å <sup>2</sup> )                             | 15.0                                                                                                               |
| R.m.s.d, bond lengths (Å)                                 | 0.012                                                                                                              |
| R.m.s.d., bond angles (°)                                 | 1.7                                                                                                                |
| Solvent content (%)                                       | 49.5                                                                                                               |
| Matthews coefficient (Å <sup>3</sup> · Da <sup>-1</sup> ) | 2.433                                                                                                              |

|                                    |                                                                                                                                                      |
|------------------------------------|------------------------------------------------------------------------------------------------------------------------------------------------------|
| No. of non-H atoms                 | 6560                                                                                                                                                 |
| No. of monomers in asymmetric unit | 2                                                                                                                                                    |
| No. of localized amino acids       | $2 \times 356$                                                                                                                                       |
| No. of water molecules             | 762                                                                                                                                                  |
| Localized ions                     | $2 \times \text{Zn}^{2+}$ , $4 \times \text{K}^+$ , $1 \times \text{Cl}^-$                                                                           |
| Ligands                            | $2 \times \text{Suprastat}$ , $7 \times 1,2\text{-ethanediol}$ , $2 \times \text{PEG residue}$ , $1 \times \text{DMSO}$ , $1 \times \text{glycerol}$ |

### 3. $^1\text{H}$ NMR and $^{13}\text{C}$ NMR spectra for compounds 6a-c

#### Compound 6a (Suprastat)

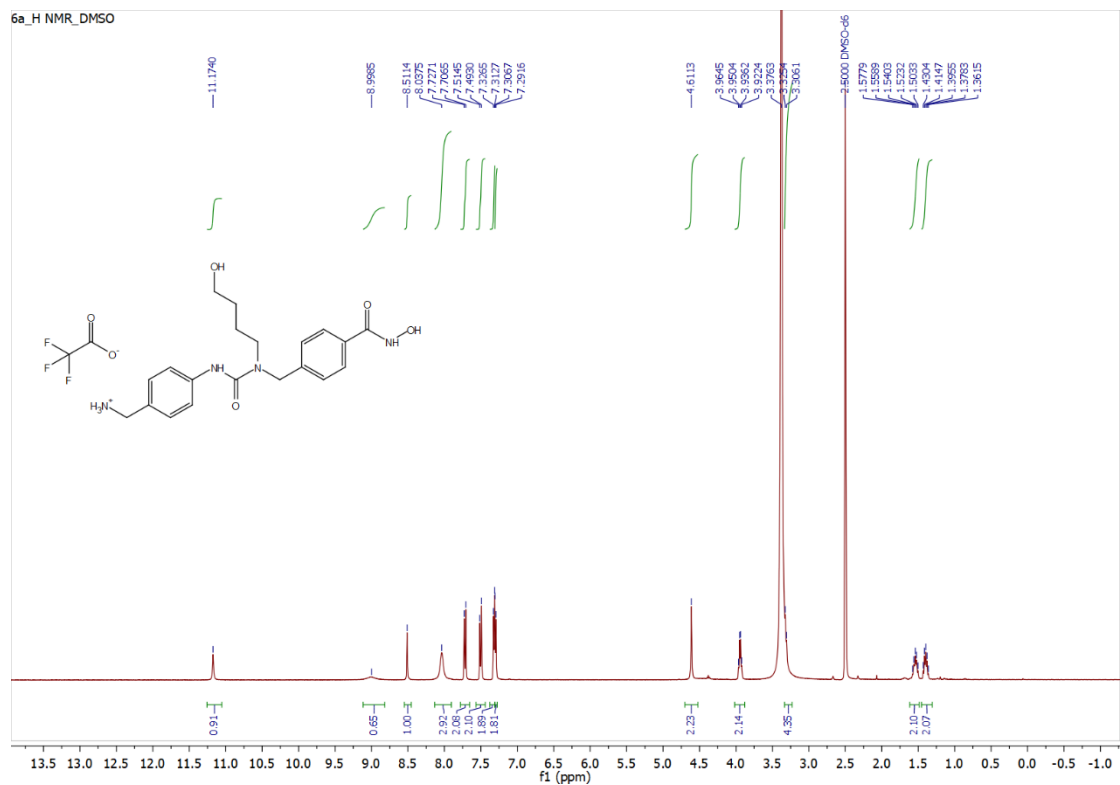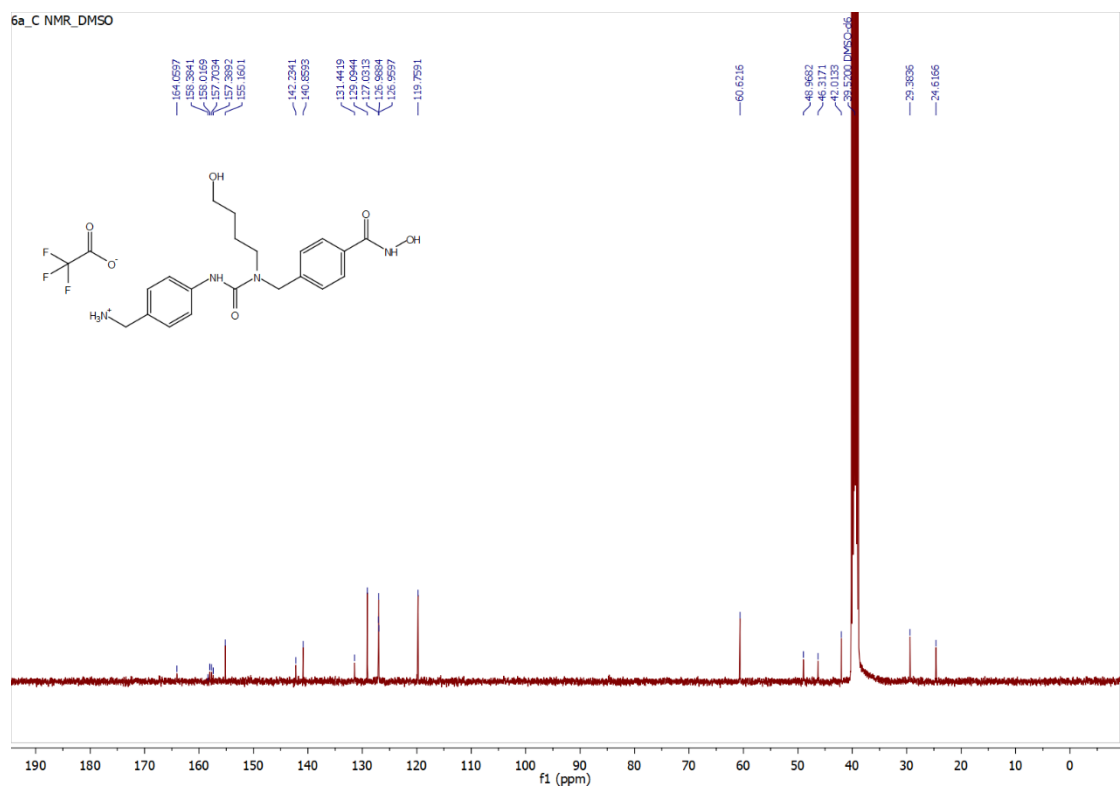



# Compound 6b

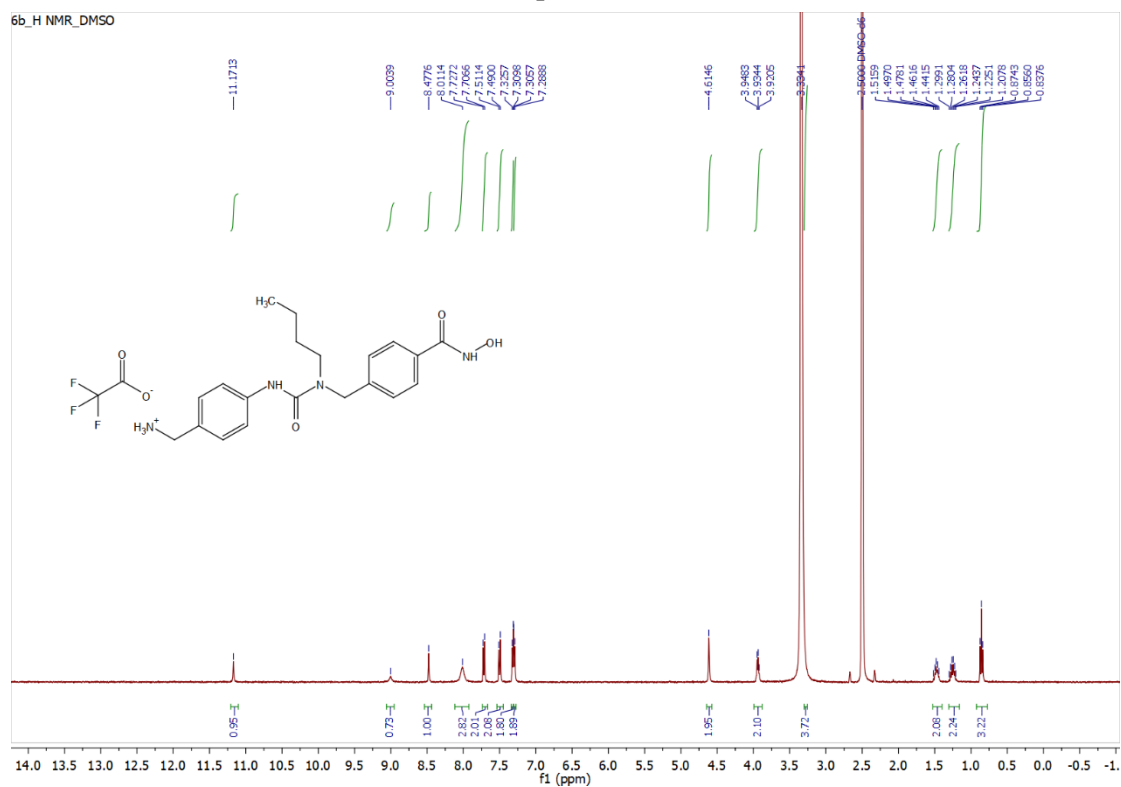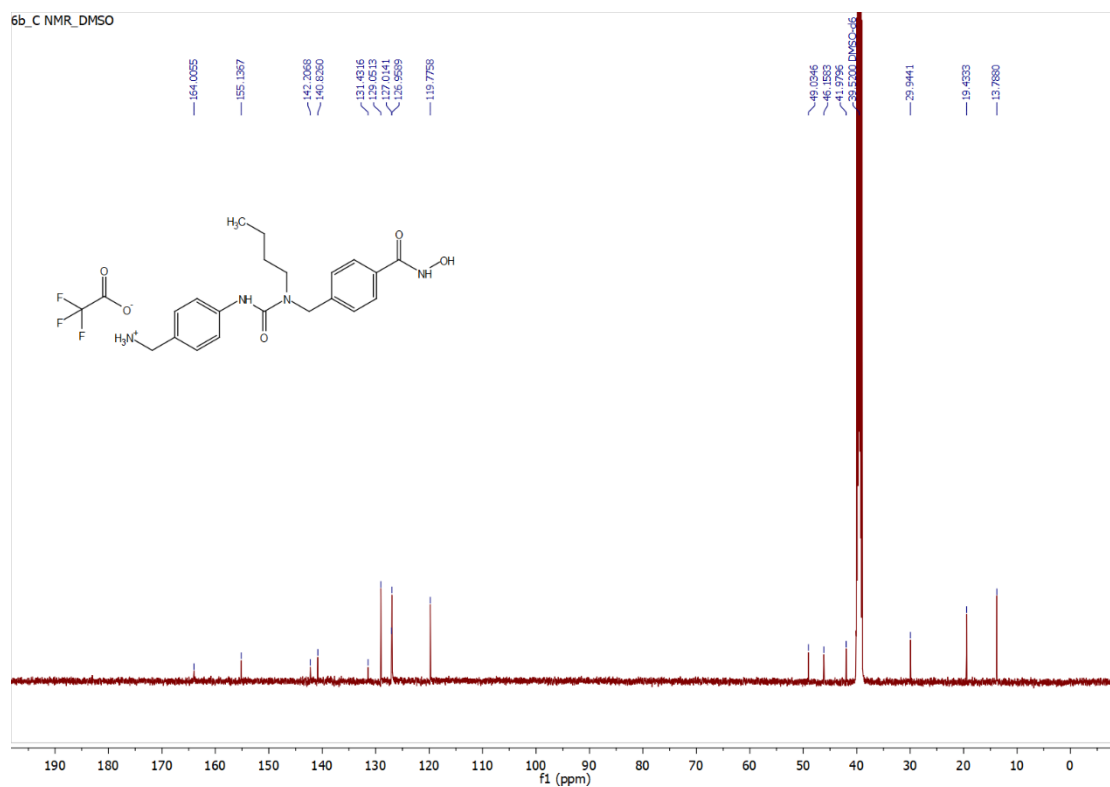

# Compound 6c

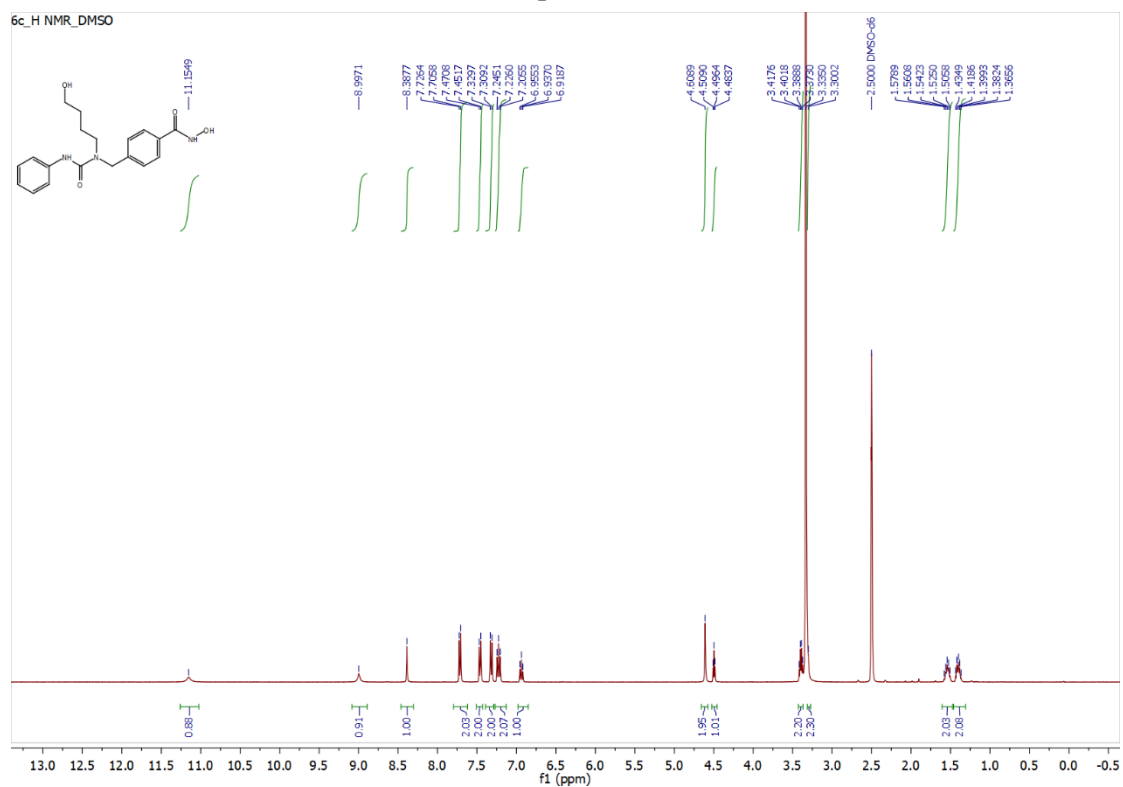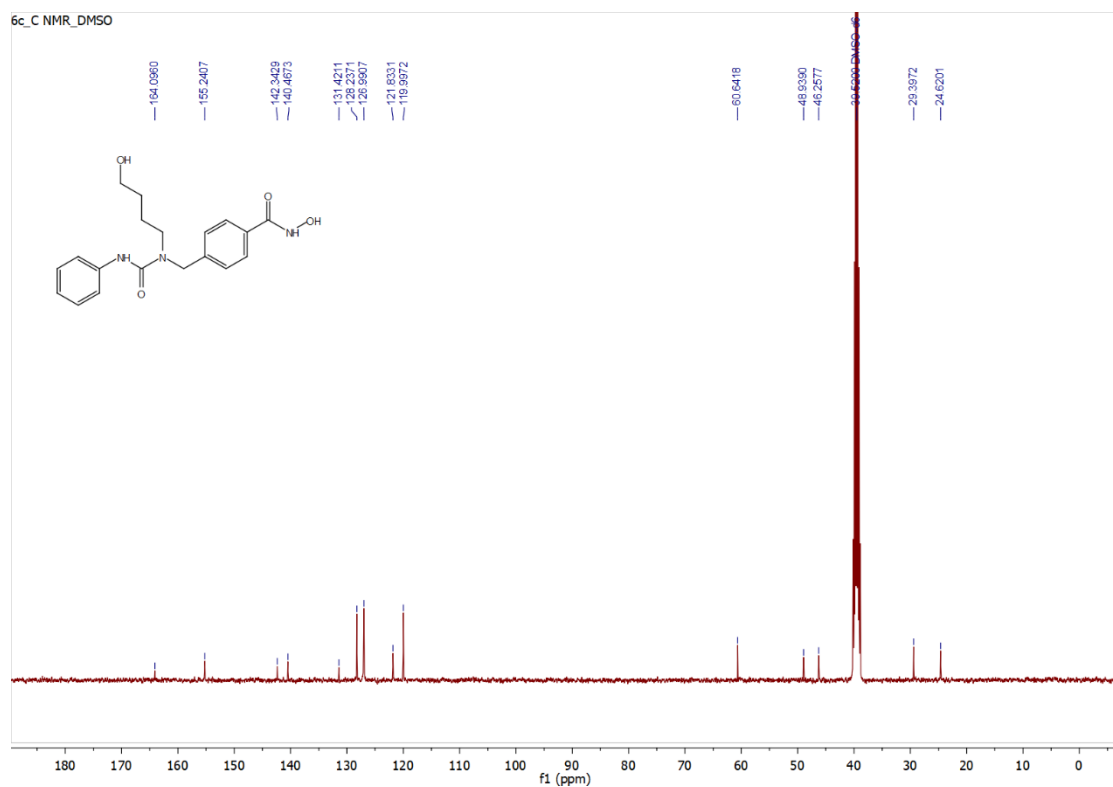

#### 4. HPLC purity reports for compounds 6a-c

##### Compound 6a (Suprastat)

Data File C:\CHEM32\1\DATA\DEF\_LC 2016-08-30 15-00-19\SS-5-55-2.D

Sample Name: SS-5-55

```
=====
Acq. Operator   :                               Seq. Line :    5
Acq. Instrument : Instrument 1                   Location  : Vial 73
Injection Date  : 8/30/2016 4:57:35 PM           Inj       :    1
                                           Inj Volume : 5.000 µl
Sequence File   : C:\Chem32\1\DATA\DEF_LC 2016-08-30 15-00-19\DEF_LC.S
Method          : C:\CHEM32\1\DATA\DEF_LC 2016-08-30 15-00-19\METHOD 3_254.M (Sequence
                  Method)
Last changed    : 8/10/2016 4:34:36 PM
=====
```

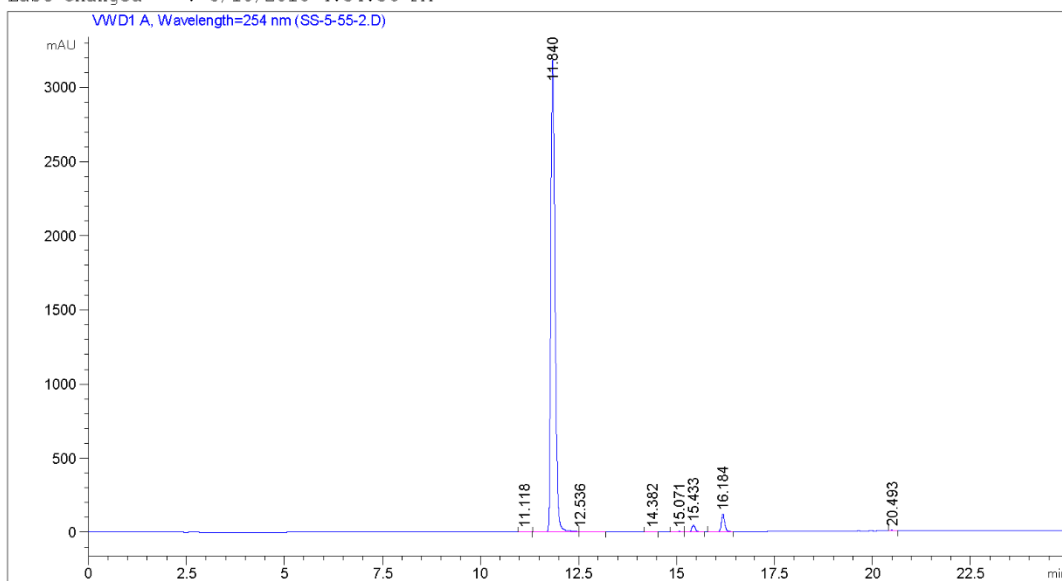

##### Area Percent Report

```
=====
Sorted By      :      Signal
Multiplier:    :      1.0000
Dilution:      :      1.0000
Use Multiplier & Dilution Factor with ISTDs
=====
```

Signal 1: VWD1 A, Wavelength=254 nm

| Peak # | RetTime [min] | Type | Width [min] | Area [mAU*s] | Height [mAU] | Area %  |
|--------|---------------|------|-------------|--------------|--------------|---------|
| 1      | 11.118        | BB   | 0.1092      | 29.67868     | 4.15943      | 0.1183  |
| 2      | 11.840        | BV   | 0.1188      | 2.39479e4    | 3182.66357   | 95.4289 |
| 3      | 12.536        | VV   | 0.2583      | 82.24677     | 3.99242      | 0.3277  |
| 4      | 14.382        | VB   | 0.0913      | 18.88880     | 3.18013      | 0.0753  |
| 5      | 15.071        | BV   | 0.0975      | 21.03066     | 3.25171      | 0.0838  |
| 6      | 15.433        | VB   | 0.0948      | 275.78290    | 44.17424     | 1.0990  |
| 7      | 16.184        | BV   | 0.0895      | 687.93182    | 117.16744    | 2.7413  |
| 8      | 20.493        | VB   | 0.0777      | 31.54695     | 6.26656      | 0.1257  |

Data File C:\CHEM32\1\DATA\DEF\_LC 2016-08-30 15-00-19\SS-5-55-2.D  
Sample Name: SS-5-55

Totals : 2.50950e4 3364.85551

=====  
\*\*\* End of Report \*\*\*

## Compound 6b

Data File C:\CHEM32\1\DATA\DEF\_LC 2016-08-30 15-00-19\SS-5-54-2.D

Sample Name: SS-5-54

```
=====
Acq. Operator   :                               Seq. Line :    4
Acq. Instrument : Instrument 1                   Location  : Vial 72
Injection Date  : 8/30/2016 4:28:49 PM           Inj       :    1
                                                Inj Volume: 5.000 µl
Different Inj Volume from Sequence !      Actual Inj Volume: 10.000 µl
Sequence File   : C:\Chem32\1\DATA\DEF_LC 2016-08-30 15-00-19\DEF_LC.S
Method          : C:\CHEM32\1\DATA\DEF_LC 2016-08-30 15-00-19\METHOD 2_254.M (Sequence
                  Method)
Last changed    : 4/26/2016 1:06:17 PM
=====
```

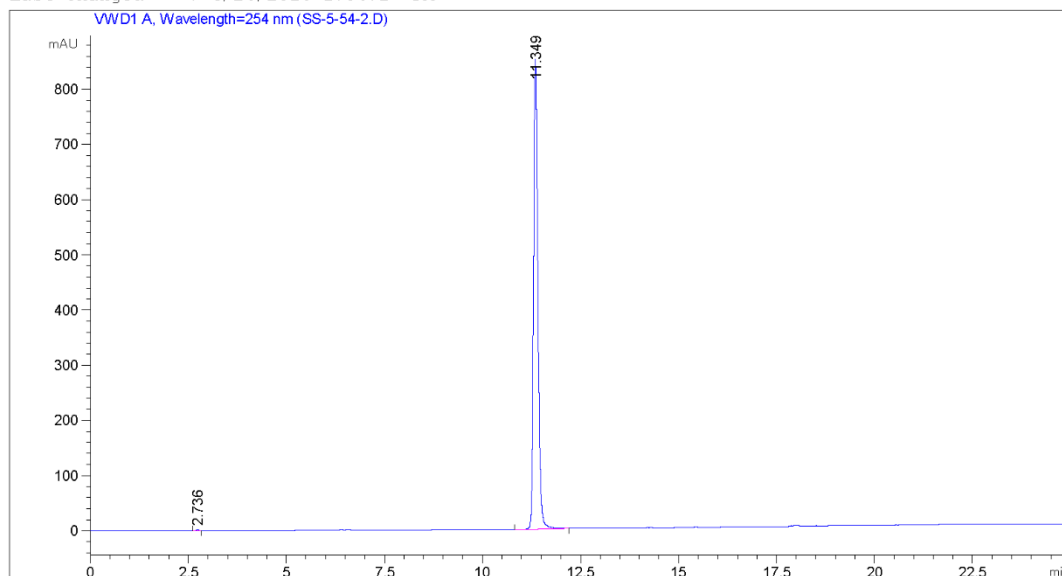

### Area Percent Report

```
=====
Sorted By      :      Signal
Multiplier:    :      1.0000
Dilution:      :      1.0000
Use Multiplier & Dilution Factor with ISTDs
=====
```

Signal 1: VWD1 A, Wavelength=254 nm

| Peak # | RetTime [min] | Type | Width [min] | Area [mAU*s] | Height [mAU] | Area %  |
|--------|---------------|------|-------------|--------------|--------------|---------|
| 1      | 2.736         | BB   | 0.0768      | 10.45858     | 1.97587      | 0.1582  |
| 2      | 11.349        | BB   | 0.1184      | 6601.07422   | 851.90906    | 99.8418 |

Totals :                      6611.53280   853.88493

\*\*\* End of Report \*\*\*

## Compound 6c

Data File C:\CHEM32\1\DATA\DEF\_LC 2016-08-29 15-08-34\SS-5-56.D

Sample Name: SS-5-56

```
=====
Acq. Operator   :                               Seq. Line :    2
Acq. Instrument : Instrument 1                   Location  : Vial 61
Injection Date  : 8/29/2016 3:22:15 PM           Inj       :    1
                                                Inj Volume: 5.000 µl
Different Inj Volume from Sequence !      Actual Inj Volume: 10.000 µl
Sequence File   : C:\Chem32\1\DATA\DEF_LC 2016-08-29 15-08-34\DEF_LC.S
Method          : C:\CHEM32\1\DATA\DEF_LC 2016-08-29 15-08-34\METHOD 2_254.M (Sequence
                  Method)
Last changed    : 4/26/2016 1:06:17 PM
=====
```

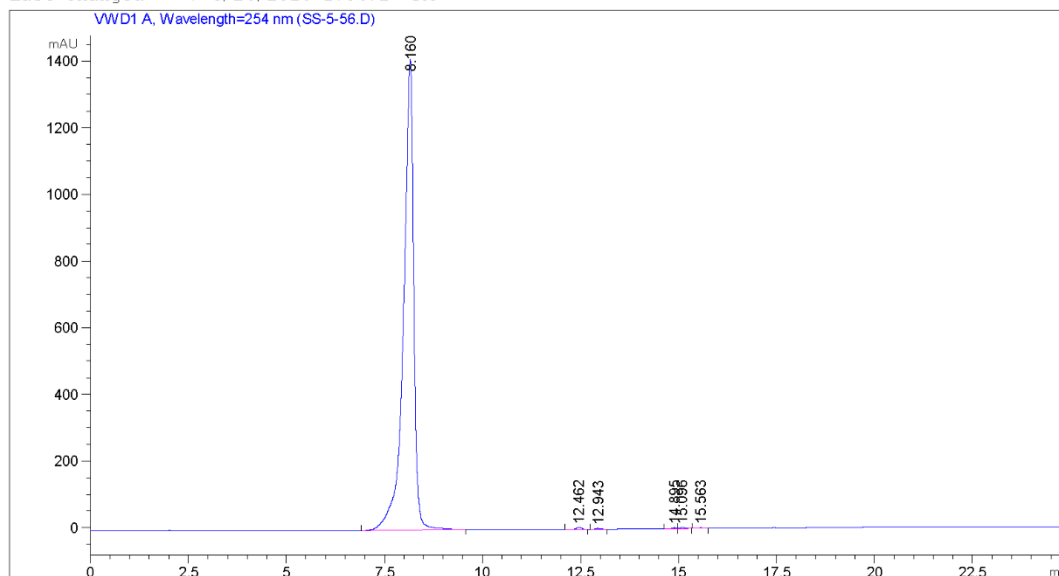

### Area Percent Report

```
=====
Sorted By      :      Signal
Multiplier:    :      1.0000
Dilution:      :      1.0000
Use Multiplier & Dilution Factor with ISTDs
=====
```

Signal 1: VWD1 A, Wavelength=254 nm

| Peak # | RetTime [min] | Type | Width [min] | Area [mAU*s] | Height [mAU] | Area %  |
|--------|---------------|------|-------------|--------------|--------------|---------|
| 1      | 8.160         | BB   | 0.2545      | 2.54958e4    | 1412.95740   | 99.5091 |
| 2      | 12.462        | BB   | 0.1199      | 45.00331     | 5.71247      | 0.1756  |
| 3      | 12.943        | BB   | 0.1211      | 14.73167     | 1.82691      | 0.0575  |
| 4      | 14.895        | EV   | 0.0918      | 18.45063     | 3.08268      | 0.0720  |
| 5      | 15.096        | VB   | 0.1218      | 30.43163     | 3.74408      | 0.1188  |
| 6      | 15.563        | BB   | 0.0964      | 17.15232     | 2.72644      | 0.0669  |

Totals : 2.56215e4 1430.04998

Instrument 1 8/29/2016 3:47:18 PM

Page 1 of 2

Data File C:\CHEM32\1\DATA\DEF\_LC 2016-08-29 15-08-34\SS-5-56.D  
Sample Name: SS-5-56

=====  
\*\*\* End of Report \*\*\*
